# Supplementary material
Source: PubMed Central journal article supplement (PMC4178779)
Supplement: JVI.01877-14_zjv999099527so1.pdf [file JVI.01877-14_zjv999099527so1.pdf]

**Table S1**

Library I of cell-permeable kinase inhibitors

| Plate Location | Inhibitor                                       | Description                                                                                                                                                                                                                                                                              | PubChem Compound ID# | Replicon Assay Inhibition (50%) | Poliovirus Inhibition in Cell Culture |
|----------------|-------------------------------------------------|------------------------------------------------------------------------------------------------------------------------------------------------------------------------------------------------------------------------------------------------------------------------------------------|----------------------|---------------------------------|---------------------------------------|
| A2             | AG 1024                                         | A specific inhibitor of insulin-like growth factor-1 (IGF-1) and insulin receptor tyrosine kinase activity (IC <sub>50</sub> = 10 nM)                                                                                                                                                    | 2044                 |                                 |                                       |
| A3             | AGL 2043                                        | A potent, selective, and reversible inhibitor of type III receptor tyrosine kinases PDGFR (IC <sub>50</sub> = 800 nM in 3T3 cells; 90 nM against purified PDGFb-receptor), Flt3, and Kit (IC <sub>50</sub> = 1-3 μM).                                                                    | 9817165              |                                 |                                       |
| A4             | Akt Inhibitor IV                                | A compound that inhibits Akt phosphorylation/activation by targeting the ATP binding site of a kinase upstream of Akt, but downstream of PI3K. Blocks Akt-mediated FOXO1a nuclear export (IC <sub>50</sub> = 625 nM) and cell proliferation (IC <sub>50</sub> < 1.25 μM) in 786-O cells. | 5719375              | +                               | +                                     |
| A5             | Akt Inhibitor V, Triciribine                    | A selective compound that inhibits the cellular phosphorylation/activation of Akt1/2/3. It does not inhibit known upstream activators of Akt, i.e. PI3K or PDK.                                                                                                                          | 290486               |                                 |                                       |
| A6             | Akt Inhibitor VIII, Isozyme-Selective, Akti-1/2 | A compound that potently and selectively inhibits Akt1/Akt2 activity (IC <sub>50</sub> = 58 nM, 210 nM, and 2.12 μM for Akt1, Akt2, and Akt3, respectively, in <i>in vitro</i> kinase assays).                                                                                           | 10196499             | +                               | -                                     |
| A7             | Akt Inhibitor X                                 | A selective inhibitor of the phosphorylation of Akt and its <i>in vitro</i> kinase activity (complete inhibition <5 μM) with minimal effect on PI 3-K, PDK1, or SGK1.                                                                                                                    | 16760284             |                                 |                                       |
| A8             | PDK1/Akt/Flt Dual Pathway Inhibitor             | Shown to directly inhibit both PDK1 and Akt activities in <i>in vitro</i> kinase assays in a dose-dependent manner and block cellular phosphorylation of Akt at both                                                                                                                     | 5113385              | +                               | toxic                                 |

|     |                            |                                                                                                                                                                                                                                                                                                                                                              |         |   |   |
|-----|----------------------------|--------------------------------------------------------------------------------------------------------------------------------------------------------------------------------------------------------------------------------------------------------------------------------------------------------------------------------------------------------------|---------|---|---|
|     |                            | Ser <sup>473</sup> and Thr <sup>308</sup> (Average IC <sub>50</sub> = 1.05, 1.91, and 0.43 μM for AML with wild-type Flt3, single mutant ITD/D835, and double mutant Flt3-ITD-TDK, respectively)                                                                                                                                                             |         |   |   |
| A9  | Aurora Kinase Inhibitor II | A compound that acts as a potent, selective inhibitor of Aurora kinases (IC <sub>50</sub> = 310 nM and 240 nM for Aurora A and B, respectively, 1.25 μM in MCF7 cells).                                                                                                                                                                                      | 6610278 |   |   |
| A10 | Bcr-abl Inhibitor          | An allosteric inhibitor of cellular Bcr-abl activity and Bcr-abl-dependent cellular functions. Exhibits potent and selective antiproliferative activity toward Bcr-abl-expressing cells (IC <sub>50</sub> = 138 nM, 194 nM, 268 nM and 273 nM in Ba/F3.p210, Ba/F3.p <sup>185Y253H</sup> , SUP-B15 and Ba/F3.p <sup>210E255V</sup> , and K562, respectively) | 5311510 |   |   |
| A11 | Bisindolylmaleimide I      | A highly selective and reversible protein kinase C (PKC) inhibitor (K <sub>i</sub> = 10 nM) that is structurally similar to staurosporine. Shows high selectivity for PKCα-, β <sub>I</sub> -, β <sub>II</sub> -, γ-, δ-, and ε-isozymes.                                                                                                                    | 2396    |   |   |
| B2  | Bisindolylmaleimide IV     | A potent, cell permeable, and selective inhibitor of PKC (IC <sub>50</sub> = 87 nM).                                                                                                                                                                                                                                                                         | 2399    |   |   |
| B3  | BPIQ-I                     | A potent and specific inhibitor of the tyrosine kinase activity of the epidermal growth factor receptor (EGFR; IC <sub>50</sub> = 25 pM).                                                                                                                                                                                                                    | 2427    |   |   |
| B4  | Chelerythrine Chloride     | Potent, selective, inhibitor of protein kinase C (IC <sub>50</sub> = 660 nM). Acts on the catalytic domain of PKC. A competitive inhibitor with respect to the phosphate acceptor and a non-competitive inhibitor with respect to ATP.                                                                                                                       | 72311   | + | - |
| B5  | Compound 56                | The most potent and specific inhibitor of the tyrosine kinase activity of the EGFR (IC <sub>50</sub> = 6 pM).                                                                                                                                                                                                                                                | 2857    |   |   |

|     |                                    |                                                                                                                                                                                                                                                                         |          |   |   |
|-----|------------------------------------|-------------------------------------------------------------------------------------------------------------------------------------------------------------------------------------------------------------------------------------------------------------------------|----------|---|---|
| B6  | DNA-PK Inhibitor II                | A potent, specific inhibitor of DNA-PK ( $IC_{50} = 230$ nM). It is highly selective towards DNA-PK over PI3K-related kinases ( $IC_{50} = 13$ $\mu$ M for PI3K and $> 100$ $\mu$ M for ATM and ATR) and has no effect on PARP-1.                                       | 9860529  |   |   |
| B7  | DNA-PK Inhibitor III               | An inhibitor of DNA-PK ( $IC_{50} = 120$ nM) and PI 3-Kinase catalytic subunit p110b ( $IC_{50} = 135$ nM).                                                                                                                                                             | 9859309  |   |   |
| B8  | PI-103                             | A compound that acts as a potent inhibitor of DNA-PK, PI3-K, and mTOR ( $IC_{50} = 2, 8, 88, 48, 150, 26, 20,$ and $83$ nM for DNA-PK, p110a, p110b, p110d, p110g, PI3-KC2b, mTORC1, and mTORC2, respectively).                                                         | 9884685  | + | + |
| B9  | Diacylglycerol Kinase Inhibitor II | Inhibits diacylglycerol kinase in isolated platelet membranes ( $IC_{50} = 300$ nM) and in intact platelets ( $IC_{50} = 120$ nM) by binding to the catalytic domain.                                                                                                   | 657356   |   |   |
| B10 | DMBI                               | A potent inhibitor of the tyrosine kinase activities of the PDGF b-receptor (b-PDGFR; $IC_{50} = 4$ $\mu$ M in PAC-1 cells) and FGFR1 ( $IC_{50} = 5$ $\mu$ M for inhibition of tyrosine phosphorylation of p90).                                                       | 5353593  |   |   |
| B11 | EGFR/ErbB-2 Inhibitor              | A potent, reversible inhibitor of EGFR and c-erbB2 ( $IC_{50} = 20$ nM & $79$ nM, respectively), members of the type I growth factor receptor family.                                                                                                                   | 9843206  |   |   |
| C2  | EGFR Inhibitor                     | A potent, and highly selective inhibitor of EGFR and some EGFR mutants ( $IC_{50} = 21$ nM, $63$ nM, and $4$ nM for EGFRwt, EGFR <sup>L858R</sup> and EGFR <sup>L861Q</sup> , respectively) vs. erbB4/Her4 ( $IC_{50} = 7.64$ $\mu$ M) and a panel of 55 other kinases. | 9549299  |   |   |
| C3  | EGFR/ErbB-2/ErbB-4 Inhibitor       | A potent and irreversible inhibitor of erbB kinase ( $IC_{50} = 0.3, 1.1,$ and $0.5$ nM for erbB-1, erbB-2, and erbB-4, respectively).                                                                                                                                  | 11566580 |   |   |
| C4  | Flt-3 Inhibitor                    | A potent, and highly selective Flt-3 inhibitor ( $IC_{50} = 42$ nM) with little effect against a panel of 22 other kinases                                                                                                                                              | 1048845  | + | - |

|     |                                         |                                                                                                                                                                                                                                                                                                                                                                                              |          |   |   |
|-----|-----------------------------------------|----------------------------------------------------------------------------------------------------------------------------------------------------------------------------------------------------------------------------------------------------------------------------------------------------------------------------------------------------------------------------------------------|----------|---|---|
|     |                                         | (IC <sub>50</sub> >3 μM).                                                                                                                                                                                                                                                                                                                                                                    |          |   |   |
| C5  | Flt-3 Inhibitor II                      | A more selective inhibitor of Flt3 over PDGFR either in cell-based receptor autophosphorylation (IC <sub>50</sub> = 40 nM vs. 300 nM) or in cell-free kinase reactions (IC <sub>50</sub> = 33 nM vs. 171 nM).                                                                                                                                                                                | 11601743 | + | + |
| C6  | cFMS Receptor Tyrosine Kinase Inhibitor | A potent, selective inhibitor of cFMS kinase activity (IC <sub>50</sub> = 30 nM) with minimal inhibition towards a panel of 26 other kinases (IC <sub>50</sub> > 5 μM).                                                                                                                                                                                                                      | 11617559 |   |   |
| C7  | Gö 6976                                 | A more selective PKC inhibitor (PKC; IC <sub>50</sub> = 7.9 nM for rat brain) that exhibits greater selectivity towards Ca <sup>2+</sup> -dependent PKC α-isozyme (IC <sub>50</sub> = 2.3 nM) and PKC <sub>β1</sub> (IC <sub>50</sub> = 6.2 nM).                                                                                                                                             | 3501     | + | - |
| C8  | Gö 6983                                 | A potent inhibitor of PKC that inhibits several PKC isoforms (IC <sub>50</sub> = 7 nM for PKC <sub>α</sub> and PKC <sub>β</sub> ; 6 nM for PKC <sub>γ</sub> ; 10 nM for PKC <sub>δ</sub> ; and 60 nM for PKC <sub>ζ</sub> ). Gö 6983 does not effectively inhibit PKC <sub>μ</sub> (IC <sub>50</sub> = 20 μM) and can thus be used to differentiate PKC <sub>μ</sub> from other PKC isoforms | 3499     |   |   |
| C9  | GTP-14564                               | A potent and specific inhibitor of class III receptor tyrosine kinases (IC <sub>50</sub> = 0.3 μM for c-fms, c-kit, wt-FLT3 and ITD-FLT3; 1.0 μM for PDGFRβ).                                                                                                                                                                                                                                | 3385203  |   |   |
| C10 | Herbimycin A, Streptomyces sp.          | A potent protein tyrosine kinase inhibitor. Inhibits p60 <sup>v-src</sup> (IC <sub>50</sub> = 12 μM) and PDGF-induced phospholipase D activation (IC <sub>50</sub> = 8 μg/ml). Also inhibits c-Src related bone resorption (IC <sub>50</sub> = 70 nM)                                                                                                                                        | 16760502 |   |   |
| C11 | Flt-3 Inhibitor III                     | A potent inhibitor of Flt3 (IC <sub>50</sub> = 50 nM). It inhibits c-Kit, KDR, c-Abl, Cdk1, c-Src, and Tie-2 only at much higher concentrations (IC <sub>50</sub> = 0.26, 0.91, 1.2, 2.1, 2.8, and 8.0 μM, respectively).                                                                                                                                                                    | 11772958 |   |   |
| D2  | IGF-1R Inhibitor II                     | An inhibitor of IGF-1R autophosphorylation (IC <sub>50</sub> = 12 μM in inhibiting ligand-induced                                                                                                                                                                                                                                                                                            | 9549305  |   |   |

|     |                      |                                                                                                                                                                                                                                                                                                                                                                                               |          |   |   |
|-----|----------------------|-----------------------------------------------------------------------------------------------------------------------------------------------------------------------------------------------------------------------------------------------------------------------------------------------------------------------------------------------------------------------------------------------|----------|---|---|
|     |                      | autophosphorylation in MCF-7 cells and < 1 $\mu$ M in a cell-free kinase assay).                                                                                                                                                                                                                                                                                                              |          |   |   |
| D3  | IRAK-1/4 Inhibitor   | A potent and selective inhibitor of interleukin-1 receptor-associated kinases ( $IC_{50}$ = 300 nM and 200 nM for IRAK-1 and -4).                                                                                                                                                                                                                                                             | 11983295 |   |   |
| D4  | JAK Inhibitor I      | A potent inhibitor of JAK1 ( $IC_{50}$ = 15 nM for murine JAK1), JAK2 ( $IC_{50}$ = 1 nM), JAK3 ( $K_i$ = 5 nM), and Tyk2 ( $IC_{50}$ = 1 nM).                                                                                                                                                                                                                                                | 5494425  |   |   |
| D5  | JAK3 Inhibitor II    | A potent, specific inhibitor of JAK3 ( $IC_{50}$ = 5.6 $\mu$ M). Has no effect on either JAK1 or JAK2.                                                                                                                                                                                                                                                                                        | 3795     |   |   |
| D6  | JAK3 Inhibitor IV    | A potent and selective inhibitor of Janus tyrosine kinase-3 (JAK3; $pIC_{50}$ = 7.1). A weak inhibitor of other tyrosine kinases ( $pIC_{50}$ = 5.6 for EGF-R; 4.4 for JAK1).                                                                                                                                                                                                                 | 176406   |   |   |
| D7  | JAK3 Inhibitor VI    | A potent inhibitor of JAK3 ( $IC_{50}$ = 27 nM) and displays ~16-fold greater selectivity over JAK2.                                                                                                                                                                                                                                                                                          | 16760524 | + | + |
| D8  | Lck Inhibitor        | A potent, selective inhibitor of Lck ( $IC_{50}$ at 5 $\mu$ M ATP = < 1 nM, 2 nM, 70 nM, 1.57 $\mu$ M and 1.98 $\mu$ M for Lck <sub>64-509</sub> Y <sup>394</sup> , Lckcd pY <sup>394</sup> , Src, Kdr and Tie-2, respectively; $IC_{50}$ at 1 mM ATP = 16 $\mu$ M, 66 nM, 126 nM, 420 nM and 5.18 $\mu$ M for Lck <sub>64-509</sub> Y <sup>394</sup> , Blk, Fyn, Lyn and Csk, respectively). | 6603792  |   |   |
| D9  | LY 294002            | A potent and specific phosphatidylinositol 3-kinase (PI3-K) inhibitor ( $IC_{50}$ = 1.4 $\mu$ M).                                                                                                                                                                                                                                                                                             | 3973     |   |   |
| D10 | LY 303511            | A negative control compound for the PI 3-kinase inhibitor LY 294002 (Cat. No. 440202).                                                                                                                                                                                                                                                                                                        | 3971     |   |   |
| D11 | Met Kinase Inhibitor | A potent, reversible inhibitor of Met kinase activity ( $IC_{50}$ = 20 nM). Exhibits > 60-fold selectivity over Flk and > 400-fold selectivity over Ron, FGFR-1, c-Src, Cdk2, PDGFRb, EGFR, and Tie-2.                                                                                                                                                                                        | 9549297  | + | - |

|     |                                             |                                                                                                                                                                                                                                                           |          |   |   |
|-----|---------------------------------------------|-----------------------------------------------------------------------------------------------------------------------------------------------------------------------------------------------------------------------------------------------------------|----------|---|---|
| E2  | PD 158780                                   | A potent inhibitor of the EGFR tyrosine kinase activity (IC <sub>50</sub> = 8 pM).                                                                                                                                                                        | 4707     |   |   |
| E3  | PD 174265                                   | A potent reversible, and selective inhibitor of EGFR tyrosine kinase activity (IC <sub>50</sub> = 450 pM).                                                                                                                                                | 4709     |   |   |
| E4  | PDGF Receptor Tyrosine Kinase Inhibitor II  | A highly selective inhibitor of platelet-derived growth factor receptor (PDGFR) tyrosine kinase (IC <sub>50</sub> = 1.1 μM in Swiss 3T3 cells for PDGFR).                                                                                                 | 5330548  |   |   |
| E5  | PDGF Receptor Tyrosine Kinase Inhibitor III | A potent and selective inhibitor of PDGF receptor family of tyrosine kinases (IC <sub>50</sub> = 50 nM for α-PDGFR; 0.80 nM for β-PDGFR; 50 nM for c-Kit; 230 nM for Flt3).                                                                               | 10907042 | + | + |
| E6  | PDGF Receptor Tyrosine Kinase Inhibitor IV  | A potent antiproliferative properties in several human tumor cell lines (IC <sub>50</sub> < 33 nM). Shown to act as reversible inhibitor of PDGFR (IC <sub>50</sub> = 4.2 nM and 45 nM for -β and -α, respectively) and c-Abl (IC <sub>50</sub> = 22 nM). | 9797370  |   |   |
| E7  | PDGF RTK Inhibitor                          | A potent and reversible inhibitor of PDGFR (IC <sub>50</sub> = 4 and 7.6 nM in ligand-induced cellular PDGFR phosphorylation and in <i>in vitro</i> kinase activity, respectively).                                                                       | 16760609 |   |   |
| E8  | PKR Inhibitor                               | A potent inhibitor of RNA-induced PKR autophosphorylation (IC <sub>50</sub> = 210 nM) and rescue PKR-dependent translation block (IC <sub>50</sub> = 100 nM).                                                                                             | 6490494  | + | - |
| E9  | PKR Inhibitor, Negative Control             | A negative control compound for PKR Inhibitor (cat. No.527450)                                                                                                                                                                                            | 16760619 |   |   |
| E10 | PI 3-Kg Inhibitor                           | An inhibitor of phosphatidylinositol 3-kinase γ (PI 3-Kg) (K <sub>i</sub> = 7.8 nM; IC <sub>50</sub> = 8 nM, 60 nM, 270 nM, 300 nM for p110-γ, α, β and δ-isoforms, respectively).                                                                        | 5289247  |   |   |
| E11 | PI 3-Kβ Inhibitor II                        | A potent inhibitor of PI 3-Kg (K <sub>i</sub> = 180 nM; IC <sub>50</sub> = 250 nM). Exhibits great selectivity over PI 3-Kα (IC <sub>50</sub> = 4.5 μM), PI 3-Kβ and δ (IC <sub>50</sub> > 20 μM).                                                        | 5287855  |   |   |

|    |                                   |                                                                                                                                                                                                                                                                                                                                                                                                                              |          |   |   |
|----|-----------------------------------|------------------------------------------------------------------------------------------------------------------------------------------------------------------------------------------------------------------------------------------------------------------------------------------------------------------------------------------------------------------------------------------------------------------------------|----------|---|---|
| F2 | PP3                               | A negative control compound for the Src family protein tyrosine kinase inhibitor PP2 (Cat. No. 529573). However, it inhibits the activity of EGFR kinase ( $IC_{50} = 2.7 \mu M$ ).                                                                                                                                                                                                                                          | 4879     |   |   |
| F3 | PP1 Analog II, 1NM-PP1            | A potent selective inhibitor of mutant kinases over wild-type. ( $IC_{50} = 3.2 nM$ for T339G, c-Fyn-as1 vs. $1.0 \mu M$ for c-Fyn; $4.3 nM$ for I338G, v-src-as1 vs. $28 \mu M$ for v-src; $5 nM$ for F80G, CDK2-as1 vs. $29 \mu M$ for CDK2; $8 nM$ for F89G, CAMK IIa-as1 vs. $24 \mu M$ for CAMKII; $120 nM$ for T315A, c-Abl-as2 vs. $3.4 \mu M$ for c-Abl). Shown to activate mutants of Ire1, a transmembrane kinase. | 5154691  |   |   |
| F4 | PKCbII/EGFR Inhibitor             | A potent inhibitor of EGFR and PKC isozymes a, bI, and bII ( $IC_{50} = 700 nM$ , $1.9 \mu M$ , $3.8 \mu M$ , and $410 nM$ , respectively).                                                                                                                                                                                                                                                                                  | 6711154  | + | - |
| F5 | PKCb Inhibitor                    | A potent inhibitor of PKC <sub>b</sub> isozymes ( $IC_{50} = 5 nM$ and $21 nM$ for human PKC <sub>bII</sub> and bI) and displays greater selectivity over PKC <sub>a, g,</sub> and e ( $IC_{50} = 331 nM$ , $> 1 \mu M$ , and $2.8 \mu M$ , respectively).                                                                                                                                                                   | 6419755  |   |   |
| F6 | Rapamycin                         | A selective inhibitor of phosphorylation and activation of p70 S6 kinase ( $IC_{50} = 50 pM$ ). Shown to inhibit later signaling events such as p110 <sup>Rb</sup> phosphorylation, p34 <sup>cdk1</sup> kinase activation, and cyclin A synthesis.                                                                                                                                                                           | 16760631 | + | - |
| F7 | Rho Kinase Inhibitor III, Rockout | A selective inhibitor of Rho kinase activity ( $IC_{50} = 25 \mu M$ ).                                                                                                                                                                                                                                                                                                                                                       | 644354   |   |   |
| F8 | Rho Kinase Inhibitor IV           | A glycol analog of Rho-Kinase Inhibitor (Cat. No. 555550) that inhibits ROCK with an improved selectivity ( $IC_{50} = 11.8 nM$ , $> 10 \mu M$ , $> 10 \mu M$ , $3.26 \mu M$ , $2.35 \mu M$ , and $2.57 \mu M$ for ROCKII, PKA, PKC, PKG, Aurora A, and CaMKII, respectively).                                                                                                                                               | 16760635 |   |   |

|     |                           |                                                                                                                                                                                                                                                                                                                         |          |   |       |
|-----|---------------------------|-------------------------------------------------------------------------------------------------------------------------------------------------------------------------------------------------------------------------------------------------------------------------------------------------------------------------|----------|---|-------|
| F9  | Staurosporine, N-benzoyl- | A broad-spectrum, reversible inhibitor of PKC (a, b and g), PDGFRb, VEGFR2, Syk, PKCh, PKCd, Flk-1, Flt3, Cdk1/B, PKA, c-Kit, c-Fgr, c-Src, VEGFR1, and EGFR (IC <sub>50</sub> = 22 nM, 50 nM, 86 nM, 95 nM, 160 nM, 330 nM, 390 nM, 528 nM, 570 nM, 570 nM, 600 nM, 790 nM, 800 nM, 912 nM, and 1.0 μM, respectively). | 16760627 | + | -     |
| F10 | Src Kinase Inhibitor I    | A potent, selective, dual site inhibitor of Src family tyrosine kinases (IC <sub>50</sub> = 44 nM and 88 nM for Src and Lck, respectively).                                                                                                                                                                             | 1474853  |   |       |
| F11 | SU11652                   | A potent inhibitor of tyrosine kinase activity of PDGFRb (IC <sub>50</sub> = 3 nM), VEGFR2 (IC <sub>50</sub> = 27 nM), FGFR1 (IC <sub>50</sub> = 170 nM), and Kit family members (IC <sub>50</sub> ~ 10-500 nM) over EGFR (IC <sub>50</sub> >20 μM).                                                                    | 5329103  | + | toxic |
| G2  | Syk Inhibitor             | A potent Syk inhibitor (IC <sub>50</sub> = 14 nM).                                                                                                                                                                                                                                                                      | 6419747  |   |       |
| G3  | Syk Inhibitor II          | A potent, selective inhibitor of Syk (IC <sub>50</sub> = 41 nM), while affecting PKC <sub>e</sub> , PKC <sub>βII</sub> , ZAP-70, Btk, and Itk only at much higher concentrations (IC <sub>50</sub> = 5.1, 11, 11.2, 15.5, and 22.6 μM, respectively).                                                                   | 16760670 |   |       |
| G4  | Syk Inhibitor III         | A selective inhibitor of Syk kinase activity (IC <sub>50</sub> = 2.5 μM).                                                                                                                                                                                                                                               | 672296   | + | -     |
| G5  | TGF-b RI Kinase Inhibitor | An inhibitor of TGF-b Receptor I kinase (IC <sub>50</sub> = 51 nM). Shown to inhibit TGF-b-dependent cellular growth (IC <sub>50</sub> = 89 nM in NIH 3T3 mouse fibroblasts) and transcription activation (IC <sub>50</sub> = 47 nM in mink lung cells).                                                                | 447966   | + | -     |
| G6  | TGF-b RI Inhibitor III    | A potent, reversible, and selective inhibitor of activin receptor-like kinase 4 (IC <sub>50</sub> = 129 nM), 5 (IC <sub>50</sub> = 47 nM), and 7.                                                                                                                                                                       | 16079009 |   |       |
| G7  | AG 9                      | A negative control compound for inhibition of EGFR (IC <sub>50</sub> >1250 μM for EGFR kinase). Has been shown to inhibit IL-2 stimulated Tyk-2                                                                                                                                                                         | 2063     |   |       |

|     |                                                     |                                                                                                                                                                                                                                                     |         |   |   |
|-----|-----------------------------------------------------|-----------------------------------------------------------------------------------------------------------------------------------------------------------------------------------------------------------------------------------------------------|---------|---|---|
|     |                                                     | phosphorylation in ConA-activated T cells.                                                                                                                                                                                                          |         |   |   |
| G8  | AG 490                                              | A potent inhibitor of EGFR kinase autophosphorylation (IC <sub>50</sub> = 100 nM).                                                                                                                                                                  | 5328779 |   |   |
| G9  | AG 112                                              | Inhibits EGFR tyrosine kinase (IC <sub>50</sub> = 125 nM).                                                                                                                                                                                          | 5328804 |   |   |
| G10 | AG 1295                                             | Selectively inhibits platelet-derived growth factor (PDGF) receptor kinase (IC <sub>50</sub> = 500 nM) and PDGF-dependent DNA synthesis (IC <sub>50</sub> = 2.5 μM) in Swiss/3T3 cells.                                                             | 2048    |   |   |
| G11 | AG 1296                                             | Inhibits PDGF receptor kinase and blocks signaling of human PDGF a-receptors (IC <sub>50</sub> = 1.0 μM) and b-receptors (IC <sub>50</sub> = 800 nM) as well as of the related stem cell factor receptor <i>c-kit</i> (80% inhibition at 5 μM).     | 2049    |   |   |
| H2  | AG 1478                                             | A very potent and selective inhibitor of EGFR kinase (IC <sub>50</sub> = 3 nM) versus HER2-neu (IC <sub>50</sub> >100 μM) and platelet-derived growth factor receptor kinase (IC <sub>50</sub> >100 μM).                                            | 2051    |   |   |
| H3  | VEGF Receptor 2 Kinase Inhibitor I                  | A highly selective, indolin-2-one class of receptor tyrosine kinase (RTK) inhibitor (IC <sub>50</sub> = 70 nM for murine vascular endothelial growth factor receptor 2 (VEGF-R2; KDR/Flk-1).                                                        | 6419834 |   |   |
| H4  | VEGF Receptor Tyrosine Kinase Inhibitor II          | A potent inhibitor of the kinase activities of KDR, Flt-1 and c-Kit (IC <sub>50</sub> = 20 nM, 180 nM and 240 nM, respectively), and minimally inhibit c-Src and EGF-R activities (IC <sub>50</sub> = 7 μM and 7.3 μM).                             | 9797919 | + | - |
| H5  | VEGF Receptor Tyrosine Kinase Inhibitor III, KRN633 | An inhibitor of VEGFR kinase activity (IC <sub>50</sub> = 170 nM, 160 nM, and 125 nM for VEGFR-1, VEGFR-2, VEGFR-3, respectively). Inhibits PDGFR-a and c-Kit only at higher concentrations (IC <sub>50</sub> = 0.97 μM and 4.33 μM, respectively). | 9549295 | + | - |
| H6  | VEGF Receptor 2 Kinase Inhibitor II                 | A indolin-2-one class of receptor tyrosine kinase (RTK) inhibitor [IC <sub>50</sub> = 70 nM for VEGF-R2 (KDR/Flk-1), 920                                                                                                                            | 5329155 |   |   |

|     |                                      |                                                                                                                                                                                                                                                                                                                                                                                                                                                                                                                                                  |          |   |   |
|-----|--------------------------------------|--------------------------------------------------------------------------------------------------------------------------------------------------------------------------------------------------------------------------------------------------------------------------------------------------------------------------------------------------------------------------------------------------------------------------------------------------------------------------------------------------------------------------------------------------|----------|---|---|
|     |                                      | nM for PDGF-Rb, 4.92 $\mu$ M for p60 <sup>c-src</sup> , and 13.3 $\mu$ M for FGF-R1].                                                                                                                                                                                                                                                                                                                                                                                                                                                            |          |   |   |
| H7  | VEGF Receptor 2 Kinase Inhibitor III | An inhibitor of VEGF-R (KDR/Flk-1) and PDGF-R tyrosine kinases (IC <sub>50</sub> = 1.04 $\mu$ M and 20 $\mu$ M in NIH 3T3 cells overexpressing Flk-1; K <sub>m</sub> = 530 nM for ATP).                                                                                                                                                                                                                                                                                                                                                          | 5329098  |   |   |
| H8  | VEGF Receptor 2 Kinase Inhibitor IV  | A potent inhibitor of VEGFR-2 (KDR/Flk-1; IC <sub>50</sub> = 19 nM). Displays ~2-fold greater selectivity for VEGFR-2 over PDGFRb (IC <sub>50</sub> = 34 nM) and 10-fold greater selectivity over VEGFR-1 (Flt-1) and VEGFR-3 (Flt-4; IC <sub>50</sub> = 190 nM) tyrosine kinase activity.                                                                                                                                                                                                                                                       | 5329468  |   |   |
| H9  | DNA-PK Inhibitor V                   | A potent, selective, and ATP-competitive inhibitor of DNA-PK (IC <sub>50</sub> = 0.27 $\mu$ M). Inhibits the PI-3 kinase catalytic subunit p110-isozymes at higher concentrations (IC <sub>50</sub> = 32 $\mu$ M, 3.7 $\mu$ M, 22 $\mu$ M and ~ 100 $\mu$ M for $\alpha$ , $\beta$ , $\delta$ and $\gamma$ , respectively). Only weakly inhibits a panel of several other kinases, including, ATM, ATR, CK2, GRK2, mTOR, PI-3KC2 $\alpha$ , PI-3KC2 $\beta$ , PI-3KC2 $\gamma$ and PI-4K $\beta$ , even at concentrations as high as 50 $\mu$ M. | 16760391 |   |   |
| H10 | Aurora Kinase Inhibitor III          | A potent, but non-selective inhibitor of Aurora A (IC <sub>50</sub> = 42 nM). At higher concentrations, also inhibits the activities of other kinases, such as Lck, Bmx, IGF-1R, and Syk (IC <sub>50</sub> = 131, 386, 591, and 887 nM, respectively).                                                                                                                                                                                                                                                                                           | 9549303  | + | - |
| H11 | Staurosporine, Streptomyces sp.      | A potent and broad spectrum inhibitor of protein kinases. Inhibits protein kinase A (IC <sub>50</sub> = 7 nM), CaM kinase (IC <sub>50</sub> = 20 nM), myosin light chain kinase (IC <sub>50</sub> = 1.3 nM), protein kinase C (IC <sub>50</sub> = 700 pM), and protein kinase G (IC <sub>50</sub> = 8.5 nM).                                                                                                                                                                                                                                     | 451705   | + | - |

**Table S2**

Library II of cell-permeable kinase inhibitors

| Plate Location | Inhibitor                    | Description                                                                                                                                                                                                                                                                                        | PubChem Compound ID#     | Replicon Assay Inhibition (50%) | Poliovirus Inhibition in Cell Culture |
|----------------|------------------------------|----------------------------------------------------------------------------------------------------------------------------------------------------------------------------------------------------------------------------------------------------------------------------------------------------|--------------------------|---------------------------------|---------------------------------------|
| A2             | KN-62                        | $K_i = 900 \text{ nM}$ for $\text{Ca}^{++}/\text{CaM}$ Kinase II <sup>1</sup>                                                                                                                                                                                                                      | <a href="#">16760529</a> |                                 |                                       |
| A3             | ATM Kinase Inhibitor         | $\text{IC}_{50} = 13 \text{ nM}$ ; $K_i = 2.2 \text{ nM}^1$                                                                                                                                                                                                                                        | <a href="#">5278396</a>  |                                 |                                       |
| A4             | ATM/ATR Kinase Inhibitor     | $\text{IC}_{50} \sim 200 \text{ nM}^1$                                                                                                                                                                                                                                                             | <a href="#">6605258</a>  | +                               | -                                     |
| A5             | Alsterpaullone               | $\text{IC}_{50} = 35 \text{ nM}$ for Cdk1/ B <sup>2</sup> $\text{IC}_{50} = 4 \text{ nM}$ for GSK-3b <sup>1</sup>                                                                                                                                                                                  | <a href="#">5005498</a>  |                                 |                                       |
| A6             | Alsterpaullone, 2-Cyanoethyl | $\text{IC}_{50} = 230 \text{ pM}$ for Cdk1/B <sup>1</sup> $\text{IC}_{50} = 800 \text{ pM}$ for GSK-3b <sup>1</sup> $\text{IC}_{50} = 30 \text{ nM}$ for cdk5/p25 <sup>1</sup>                                                                                                                     | <a href="#">16760286</a> |                                 |                                       |
| A7             | Aloisine A, RP107            | $\text{IC}_{50} = 150 \text{ nM}$ for Cdk1/B <sup>2</sup> $\text{IC}_{50} = 120 \text{ nM}$ for Cdk2/A <sup>2</sup> $\text{IC}_{50} = 400 \text{ nM}$ for Cdk2/E <sup>2</sup> $\text{IC}_{50} = 160 \text{ nM}$ for Cdk5/p35 <sup>2</sup> $\text{IC}_{50} = 500 \text{ nM}$ for GSK3a <sup>2</sup> | <a href="#">5326843</a>  |                                 |                                       |
| A8             | Aloisine, RP106              | $\text{IC}_{50} = 700 \text{ nM}$ for CDK1/B <sup>1</sup> $\text{IC}_{50} = 1.5 \text{ mM}$ CDK5/p25 <sup>1</sup> $\text{IC}_{50} = 920 \text{ nM}$ for GSK-3 <sup>1</sup>                                                                                                                         | <a href="#">3641059</a>  |                                 |                                       |
| A9             | Aminopurvalanol A            | $\text{IC}_{50} = 33 \text{ nM}$ for Cdk1/B and Cdk2/A <sup>1,2</sup> $\text{IC}_{50} = 28 \text{ nM}$ for Cdk2/E <sup>1,2</sup> $\text{IC}_{50} = 20 \text{ nM}$ for Cdk5/p35 <sup>1,2</sup>                                                                                                      | <a href="#">6604931</a>  |                                 |                                       |
| A10            | AMPK Inhibitor, Compound C   | $K_i = 109 \text{ nM}$ in the presence of 5mM ATP and absence of AMP <sup>1</sup>                                                                                                                                                                                                                  | <a href="#">11524144</a> |                                 |                                       |
| A11            | Aurora Kinase Inhibitor III  | $\text{IC}_{50} = 42 \text{ nM}$ for Aurora A <sup>1</sup> $\text{IC}_{50} = 131 \text{ nM}$ for Lck <sup>1</sup> $\text{IC}_{50} = 386 \text{ nM}$ for Bmx <sup>1</sup> $\text{IC}_{50} = 591 \text{ nM}$ for IGF-1R <sup>1</sup> $\text{IC}_{50} = 887 \text{ nM}$ for Syk <sup>1</sup>          | <a href="#">9549303</a>  |                                 |                                       |
| B2             | Aurora Kinase/Cdk Inhibitor  | $\text{IC}_{50} = 11 \text{ nM}$ for Aurora A <sup>2</sup> $\text{IC}_{50} = 15 \text{ nM}$ for Aurora B <sup>2</sup> $\text{IC}_{50} = 9 \text{ nM}$ for Cdk1/B <sup>2</sup> $\text{IC}_{50} = 4 \text{ nM}$ for Cdk2/A <sup>2</sup> $\text{IC}_{50} = 3 \text{ nM}$ for Cdk2/E <sup>2</sup>      | <a href="#">16760303</a> |                                 |                                       |

|     |                                      |                                                                                                                                                                                                               |                 |   |       |
|-----|--------------------------------------|---------------------------------------------------------------------------------------------------------------------------------------------------------------------------------------------------------------|-----------------|---|-------|
| B3  | Indirubin-3'-monoxime                | IC <sub>50</sub> = 180nM for Cdk1 <sup>1,2</sup> IC <sub>50</sub> = 100 nM for Cdk5 <sup>1,2</sup> IC <sub>50</sub> = 22 nM for GSKb <sup>1,2</sup>                                                           | <u>5326739</u>  |   |       |
| B4  | BAY 11-7082                          | IC <sub>50</sub> < 10 mM                                                                                                                                                                                      | <u>5353431</u>  |   |       |
| B5  | Bohemine                             | IC <sub>50</sub> = 1mM for Cdk1 <sup>2</sup>                                                                                                                                                                  | <u>2422</u>     |   |       |
| B6  | Cdk1 Inhibitor                       | IC <sub>50</sub> = 5.8mM for Cdk1 <sup>2</sup> IC <sub>50</sub> = 25mM for Cdk5 <sup>2</sup>                                                                                                                  | <u>5472558</u>  |   |       |
| B7  | Cdk1 Inhibitor, CGP74514A            | IC <sub>50</sub> =25 nM for Cdk1 <sup>2</sup>                                                                                                                                                                 | <u>2794188</u>  |   |       |
| B8  | Cdk1/2 Inhibitor III                 | IC <sub>50</sub> =600 pM for Cdk1/B <sup>1</sup> IC <sub>50</sub> = 500 pM for Cdk2/A <sup>1</sup>                                                                                                            | <u>5330812</u>  | + | -     |
| B9  | Cdk1/5 Inhibitor                     | IC <sub>50</sub> = 600 nM for Cdk1/B <sup>1</sup> IC <sub>50</sub> = 400 nM for Cdk5/p25 <sup>1</sup> IC <sub>50</sub> = 1 mM for GSK-3b <sup>1</sup>                                                         | <u>438981</u>   |   |       |
| B10 | Casein Kinase I Inhibitor, D4476     | IC <sub>50</sub> = 500 nM for ALK5 <sup>1</sup> IC <sub>50</sub> = 12 mM for p38a MAPK <sup>1</sup> IC <sub>50</sub> = 0.3 mM for CK1d <sup>1</sup> IC <sub>50</sub> = 200 nM for CK1 (S. pombe) <sup>1</sup> | <u>6419753</u>  |   |       |
| B11 | Casein Kinase II Inhibitor III, TBCA | IC <sub>50</sub> = 110 nM for CK2 <sup>1</sup>                                                                                                                                                                | <u>16760346</u> |   |       |
| C2  | Cdk4 Inhibitor                       | IC <sub>50</sub> = 76 nM for Cdk4/D1 <sup>1</sup> IC <sub>50</sub> = 520 nM for Cdk2/E <sup>1</sup> IC <sub>50</sub> = 2.1 mM for Cdk1/B <sup>1</sup>                                                         | <u>5330797</u>  |   |       |
| C3  | Cdk4 Inhibitor II, NSC 625987        | IC <sub>50</sub> =200 nM for Cdk4/D1 <sup>1</sup>                                                                                                                                                             | <u>3004085</u>  |   |       |
| C4  | Cdk4 Inhibitor III                   | IC <sub>50</sub> = 6 mM for Cdk4/D1 <sup>1</sup> IC <sub>50</sub> >200mM for Cdk2/A <sup>1</sup>                                                                                                              | <u>481747</u>   | + | toxic |
| C5  | Cdc2-Like Kinase Inhibitor, TG003    | IC <sub>50</sub> = 15 nM for mClk4 <sup>1</sup> IC <sub>50</sub> = 20 nm for mClk1 <sup>1</sup> IC <sub>50</sub> = 200 nM for mClk2 <sup>1</sup>                                                              | <u>1893668</u>  |   |       |
| C6  | Chk2 Inhibitor II                    | IC <sub>50</sub> = 15 nM for Chk2 <sup>1</sup> IC <sub>50</sub> = 12 mM for Cdk1/B <sup>1</sup> IC <sub>50</sub> = 17 mM for CK1 <sup>1</sup>                                                                 | <u>9969021</u>  |   |       |
| C7  | Compound 52                          | IC <sub>50</sub> = 7 mM for Cdc28p <sup>1</sup> IC <sub>50</sub> = 2 mM for Pho85p <sup>1</sup>                                                                                                               | <u>2856</u>     |   |       |

|     |                                    |                                                                                                                                                                                                                                                                                                                                                                                                                         |                 |   |       |
|-----|------------------------------------|-------------------------------------------------------------------------------------------------------------------------------------------------------------------------------------------------------------------------------------------------------------------------------------------------------------------------------------------------------------------------------------------------------------------------|-----------------|---|-------|
| C8  | Cdk2 Inhibitor III                 | IC <sub>50</sub> = 500 nM for Cdk2/A and Cdk2/E <sup>1</sup><br>IC <sub>50</sub> = 4.2 mM for Cdk1/B <sup>1</sup> IC <sub>50</sub> = 215 mM for Cdk4/D1 <sup>1</sup>                                                                                                                                                                                                                                                    | <u>6918386</u>  |   |       |
| C9  | Cdk2 Inhibitor IV, NU6140          | IC <sub>50</sub> = 6.6 mM for Cdk1/B <sup>1</sup> IC <sub>50</sub> = 0.41 mM for Cdk2/A <sup>1</sup> IC <sub>50</sub> = 5.5 mM for Cdk4/D <sup>1</sup><br>IC <sub>50</sub> =15 mM for Cdk5/p25 <sup>1</sup> IC <sub>50</sub> = 3.9 mM for Cdk7/B <sup>1</sup>                                                                                                                                                           | <u>10202471</u> | - | -     |
| C10 | Cdk/Crk Inhibitor                  | IC <sub>50</sub> = 48 nM for Cdk1/B <sup>1</sup> IC <sub>50</sub> = 15 nM for Cdk2/E <sup>1</sup> IC <sub>50</sub> = 9 nM for Cdk3/E <sup>1</sup><br>IC <sub>50</sub> = 10nM for Cdk5/p35 <sup>1</sup> IC <sub>50</sub> = 71 nM for Cdk7/H/MAT1 <sup>1</sup> IC <sub>50</sub> = 839 nM for Cdk4/D1 <sup>1</sup> IC <sub>50</sub> = 282 nM for Cdk6/D3 <sup>1</sup><br>IC <sub>50</sub> = 754 nM for GSK-3b <sup>1</sup> | <u>9549301</u>  |   |       |
| C11 | ERK Inhibitor III                  | N/A                                                                                                                                                                                                                                                                                                                                                                                                                     | <u>5339183</u>  |   |       |
| D2  | ROCK Inhibitor, Y-27632            | K <sub>i</sub> = 140 nM for p160Rock (ROCK-I) <sup>1</sup>                                                                                                                                                                                                                                                                                                                                                              | <u>9797929</u>  |   |       |
| D3  | ERK Inhibitor II, FR180204         | IC <sub>50</sub> = 510 nM for ERK1 <sup>1</sup> IC <sub>50</sub> = 330 nM for ERK2 <sup>1</sup>                                                                                                                                                                                                                                                                                                                         | <u>11493598</u> |   |       |
| D4  | ERK Inhibitor II, Negative control | Inactive for ERK1 and ERK2 <sup>1</sup>                                                                                                                                                                                                                                                                                                                                                                                 | <u>16760417</u> |   |       |
| D5  | Fascaplysin, Synthetic             | IC <sub>50</sub> = 350nM for Cdk4/D1 <sup>1</sup> IC <sub>50</sub> = 3.4 mM for Cdk6/D1 <sup>1</sup>                                                                                                                                                                                                                                                                                                                    | <u>73292</u>    | + | toxic |
| D6  | GSK-3b Inhibitor I                 | IC <sub>50</sub> = 2 mM <sup>2,3</sup> IC <sub>50</sub> = 673 nM for Flt-3 <sup>2,3</sup><br>IC <sub>50</sub> =1.4-5.5 mM for various PKC isoforms <sup>2,3</sup>                                                                                                                                                                                                                                                       | <u>4124851</u>  |   |       |
| D7  | GSK-3b Inhibitor II                | IC <sub>50</sub> = 390 nM for GSK-3 <sup>1</sup>                                                                                                                                                                                                                                                                                                                                                                        | <u>6539732</u>  |   |       |
| D8  | GSK-3b Inhibitor VIII              | IC <sub>50</sub> = 104 nM for GSK-3 <sup>1</sup>                                                                                                                                                                                                                                                                                                                                                                        | <u>448014</u>   |   |       |
| D9  | GSK-3 Inhibitor IX                 | IC <sub>50</sub> = 5 nM for GSK-3a/b <sup>1</sup> IC <sub>50</sub> = 83 nM for Cdk5/p25 <sup>1</sup> IC <sub>50</sub> = 300 nM for Cdk2/A <sup>1</sup> IC <sub>50</sub> = 320 nM for Cdk1/B <sup>1</sup>                                                                                                                                                                                                                | <u>5287844</u>  |   |       |
| D10 | GSK-3 Inhibitor X                  | IC <sub>50</sub> = 10 nM for GSK-3a/b <sup>1</sup> IC <sub>50</sub> = 2.4 mM for Cdk5/p25 <sup>1</sup> IC <sub>50</sub> = 4.3 mM for                                                                                                                                                                                                                                                                                    | <u>6538818</u>  |   |       |

|     |                                 |                                                                                                                                                                                                       |                 |   |   |
|-----|---------------------------------|-------------------------------------------------------------------------------------------------------------------------------------------------------------------------------------------------------|-----------------|---|---|
|     |                                 | Cdk2/A <sup>1</sup>                                                                                                                                                                                   |                 |   |   |
| D11 | GSK-3b Inhibitor XI             | K <sub>i</sub> = 25 nM for GSK-3b <sup>1</sup>                                                                                                                                                        | <u>10020713</u> |   |   |
| E2  | SU6656                          | IC <sub>50</sub> = 280 nM for Src <sup>1</sup> IC <sub>50</sub> = 170 nM for Fyn <sup>1</sup> IC <sub>50</sub> = 20 nM for Yes <sup>1</sup> IC <sub>50</sub> = 130 nM for Lyn <sup>1</sup>            | <u>5312137</u>  |   |   |
| E3  | GSK-3 Inhibitor XIII            | K <sub>i</sub> = 24 nM for GSK-3 <sup>1</sup>                                                                                                                                                         | <u>6419766</u>  |   |   |
| E4  | Isogranulatimide                | IC <sub>50</sub> = 100 nm for Chk1 <sup>1</sup> IC <sub>50</sub> = 500 nM for GSK-3b <sup>1</sup> IC <sub>50</sub> = 3 mM for Chk2 <sup>1</sup>                                                       | <u>6419741</u>  |   |   |
| E5  | IC261                           | IC <sub>50</sub> = 0.7-1.3 mM for CK1d <sup>2</sup> IC <sub>50</sub> = 0.6-1.4 mM for CK1e <sup>2</sup> IC <sub>50</sub> = 11-21mM for CK1a <sub>1</sub> <sup>2</sup>                                 | <u>3674</u>     |   |   |
| E6  | IKK-2 Inhibitor IV              | IC <sub>50</sub> = 18 nM for IKK-2 <sup>1</sup>                                                                                                                                                       | <u>9903786</u>  |   |   |
| E7  | Indirubin Derivative E804       | IC <sub>50</sub> = 430 nM for Src <sup>1</sup> IC <sub>50</sub> = 210 nM for Cdk1/E <sup>1</sup> IC <sub>50</sub> = 540 nM for Cdk2/A <sup>1</sup> IC <sub>50</sub> = 1.65 mM for Cdk1/B <sup>1</sup> | <u>6419764</u>  | + | + |
| E8  | JNK Inhibitor II                | IC <sub>50</sub> = 110nM for JNK1 and JNK2 <sup>2,3</sup> IC <sub>50</sub> = 150-190 nM for JNK3 <sup>2,3</sup>                                                                                       | <u>8515</u>     |   |   |
| E9  | JNK Inhibitor, Negative Control | IC <sub>50</sub> = 18 mM for JNK2 <sup>1</sup> IC <sub>50</sub> = 24 mM for JNK3 <sup>1</sup>                                                                                                         | <u>11665831</u> |   |   |
| E10 | JNK Inhibitor V                 | IC <sub>50</sub> = 150 nM for hJNK1 <sup>1</sup> IC <sub>50</sub> = 220 nM for hJNK2 <sup>1</sup> IC <sub>50</sub> = 70 nM for hJNK3 <sup>1</sup>                                                     | <u>11422035</u> | + | - |
| E11 | JNK Inhibitor IX                | pIC <sub>50</sub> = 6.5 for JNK2 <sup>1</sup> pIC <sub>50</sub> = 6.7 for JNK3 <sup>1</sup>                                                                                                           | <u>16760525</u> |   |   |
| F2  | MK2a Inhibitor                  | K <sub>i</sub> <sup>app</sup> = 330 nM for p38a-dependent phosphorylation <sup>1</sup>                                                                                                                | <u>11382492</u> |   |   |
| F3  | JNK Inhibitor VIII              | K <sub>i</sub> = 2nM for JNK1 <sup>1</sup> K <sub>i</sub> = 4 nM for JNK2 <sup>1</sup> K <sub>i</sub> = 52 nM for JNK3 <sup>1</sup>                                                                   | <u>11624601</u> |   |   |
| F4  | K-252a, Nocardiosis sp.         | K <sub>i</sub> = 18 nM for PKA <sup>2</sup> K <sub>i</sub> = 25 nM for PKC <sup>2</sup> K <sub>i</sub> = 20 nM for PKG <sup>2</sup>                                                                   | <u>490561</u>   | + | - |
| F5  | Kenpaullone                     | IC <sub>50</sub> =230 nM for GSK-3b <sup>2</sup> IC <sub>50</sub> =470 nM                                                                                                                             | <u>3820</u>     |   |   |

|     |                                                             |                                                                                                                                                                                                      |                 |   |   |
|-----|-------------------------------------------------------------|------------------------------------------------------------------------------------------------------------------------------------------------------------------------------------------------------|-----------------|---|---|
|     |                                                             | for Lck <sup>2</sup> IC <sub>50</sub> =400 nM for Cdk1/B <sup>2</sup> IC <sub>50</sub> =680 nM for Cdk2/A <sup>2</sup> IC <sub>50</sub> = 850 nM for Cdk5/p25 <sup>2</sup>                           |                 |   |   |
| F6  | KN-93                                                       | K <sub>i</sub> = 370 nM for CaMKII <sup>2</sup>                                                                                                                                                      | <u>5312122</u>  | + | - |
| F7  | MEK Inhibitor I                                             | IC <sub>50</sub> = 12 nM for MEK <sup>1</sup> IC <sub>50</sub> >1 mM for MKK3 and MKK4 <sup>1</sup>                                                                                                  | <u>9951490</u>  |   |   |
| F8  | MEK Inhibitor II                                            | IC <sub>50</sub> = 380 nM for MEK1 <sup>1</sup>                                                                                                                                                      | <u>389898</u>   |   |   |
| F9  | MEK1/2 Inhibitor                                            | IC <sub>50</sub> = 180 nM for MEK1 <sup>2</sup> IC <sub>50</sub> = 220 nM for MEK2 <sup>2</sup>                                                                                                      | <u>9549284</u>  |   |   |
| F10 | MNK1 Inhibitor                                              | IC <sub>50</sub> = 2.2 mM for MNK1 <sup>1</sup>                                                                                                                                                      | <u>11644425</u> |   |   |
| F11 | NF-kB Activation Inhibitor                                  | IC <sub>50</sub> = 11 nM for the inhibition of NFKB activation in Jurkat cells transfected with pNFKB-Luc <sup>1</sup>                                                                               | <u>509554</u>   |   |   |
| G2  | p38 MAP Kinase Inhibitor III                                | IC <sub>50</sub> = 380 nM for p38a <sup>1</sup>                                                                                                                                                      | <u>6419739</u>  | + | - |
| G3  | p38 MAP Kinase Inhibitor                                    | IC <sub>50</sub> = 35 nM for p38MAPK <sup>1</sup>                                                                                                                                                    | <u>4665</u>     |   |   |
| G4  | PD 98059                                                    | N/A                                                                                                                                                                                                  | <u>4713</u>     |   |   |
| G5  | PD 169316                                                   | IC <sub>50</sub> = 89 nM for p38 MAPK <sup>2</sup>                                                                                                                                                   | <u>4712</u>     |   |   |
| G6  | SB220025                                                    | IC <sub>50</sub> = 60 nM for p38 MAP Kinase <sup>3</sup>                                                                                                                                             | <u>5164</u>     |   |   |
| G7  | Purvalanol A                                                | IC <sub>50</sub> = 4 nM for Cdc2/B <sup>1</sup> IC <sub>50</sub> = 70 nm for CDK2/A <sup>1</sup> IC <sub>50</sub> = 35 nM for CDK2/E <sup>1</sup> IC <sub>50</sub> = 75 nM for CDK5/p35 <sup>1</sup> | <u>4987</u>     | + | - |
| G8  | GSK3b Inhibitor XII, TWS119                                 | IC <sub>50</sub> = 30 nM for GSK-3b <sup>1</sup>                                                                                                                                                     | <u>9549289</u>  |   |   |
| G9  | H-89, Dihydrochloride                                       | K <sub>i</sub> = 48 nM for PKA <sup>2</sup> IC <sub>50</sub> = 270 nM for ROCK-II <sup>3</sup>                                                                                                       | <u>5702541</u>  |   |   |
| G10 | SB 202474, Negative control for p38 MAPK inhibition studies | Inactive compound on p38 MAPK <sup>1</sup>                                                                                                                                                           | <u>5162</u>     |   |   |

|     |                                    |                                                                                                                                                                                                                                                                          |                 |   |   |
|-----|------------------------------------|--------------------------------------------------------------------------------------------------------------------------------------------------------------------------------------------------------------------------------------------------------------------------|-----------------|---|---|
| G11 | SB 202190                          | $K_i = 16 \text{ nM}$ for p38MAPK <sup>2</sup> $IC_{50} = 350 \text{ nM}$ for p38b <sup>3</sup>                                                                                                                                                                          | <u>5353940</u>  |   |   |
| H2  | SB 203580                          | $IC_{50} = 34 \text{ nM}$ for p38MAPK <sup>4</sup> $IC_{50} = 600 \text{ nM}$ in cells <sup>5</sup>                                                                                                                                                                      | <u>176155</u>   |   |   |
| H3  | HA 1077,<br>DihydrochlorideFasudil | $K_i = 1.6 \text{ mM}$ for PKA <sup>1</sup> $K_i = 1.6 \text{ mM}$ for PKG <sup>1</sup> $K_i = 36 \text{ mM}$ for MLCK <sup>1</sup> $IC_{50} = 10.7 \text{ mM}$ for ROCK <sup>2</sup>                                                                                    | <u>16219471</u> |   |   |
| H4  | SB 218078                          | $IC_{50} = 15 \text{ nM}$ for Chk1 <sup>1</sup> $K_i = 15 \text{ nM}$ for Chk1 <sup>2</sup> $K_i = 23 \text{ nM}$ for CDK1 <sup>2</sup> $K_i = 5.6 \text{ nM}$ for CDK2 <sup>2</sup> $K_i = 16 \text{ nM}$ for CDK4 <sup>2</sup>                                         | <u>3387354</u>  | + | - |
| H5  | SC-68376                           | $IC_{50} = 2\text{-}5 \text{ mM}$ for p38 MAPK <sup>1</sup>                                                                                                                                                                                                              | <u>5174</u>     |   |   |
| H6  | SKF-86002                          | $IC_{50} = 1.30 \pm 1 \mu\text{M}$ inhibiting IL-1 production by LPS-stimulated human monocytes <sup>3</sup>                                                                                                                                                             | <u>5228</u>     |   |   |
| H7  | Sphingosine Kinase Inhibitor       | $IC_{50} = 500 \text{ nM}$ for hSK <sup>1</sup>                                                                                                                                                                                                                          | <u>16760659</u> | - | - |
| H8  | Staurosporine,<br>Streptomyces sp. | $IC_{50} = 20 \text{ nM}$ for CaM kinase <sup>1,2,3</sup> $IC_{50} = 0.7 \text{ nM}$ for PKC <sup>1,2,3</sup> $IC_{50} = 1.3 \text{ nM}$ for MLCK <sup>1,2,3</sup> $IC_{50} = 8.5 \text{ nM}$ for PKG <sup>1,2,3</sup> $IC_{50} = 7 \text{ nM}$ for PKA <sup>1,2,3</sup> | <u>451705</u>   | + | - |
| H9  | STO-609                            | $IC_{50} = \sim 10 \text{ mg/ml}$ for CaM-KII <sup>1</sup> $IC_{50} = 120 \text{ ng/ml}$ for CaM-KKa <sup>1</sup> $IC_{50} = 40 \text{ ng/ml}$ for CaM-KKb <sup>1</sup>                                                                                                  | <u>16760660</u> |   |   |
| H10 | SU9516                             | $IC_{50} = 22 \text{ nM}$ for Cdk2/A <sup>1</sup> $IC_{50} = 40 \text{ nM}$ for Cdk1/B <sup>1</sup> $IC_{50} = 22 \text{ nM}$ for Cdk4/D1 <sup>1</sup>                                                                                                                   | <u>5289419</u>  |   |   |
| H11 | Tpl2 Kinase Inhibitor              | $IC_{50} = 50 \text{ nM}$ for Tpl2 Kinase                                                                                                                                                                                                                                | <u>9549300</u>  | + | - |
